# Supplementary material
Source: Elsevier journal article supplement (https://comptes-rendus.academie-sciences.fr/chimie/article/10.1016/j.crci.2010.06.017/file/attach/mmc1.pdf)

# checkCIF/PLATON report

No syntax errors found.    CIF dictionary    Interpreting this report

## Datablock: dl184ef1

---

Bond precision:    C-C = 0.0088 A                      Wavelength=0.71073

Cell:                      a=16.0741(5)              b=12.4076(4)              c=19.9806(5)  
                            alpha=90                      beta=90                      gamma=90

Temperature:              180 K

|                | Calculated            | Reported              |
|----------------|-----------------------|-----------------------|
| Volume         | 3985.0(2)             | 3985.0(2)             |
| Space group    | P b c a               | P b c a               |
| Hall group     | -P 2ac 2ab            | -P 2ac 2ab            |
| Moiety formula | C28 H60 Cl4 N4 P2 Pd2 | C28 H60 Cl4 N4 P2 Pd2 |
| Sum formula    | C28 H60 Cl4 N4 P2 Pd2 | C28 H60 Cl4 N4 P2 Pd2 |
| Mr             | 869.34                | 869.34                |
| Dx,g cm-3      | 1.449                 | 1.449                 |
| Z              | 4                     | 4                     |
| Mu (mm-1)      | 1.274                 | 1.274                 |
| F000           | 1784.0                | 1784.0                |
| F000'          | 1779.53               |                       |
| h,k,lmax       | 19,15,24              | 19,15,24              |
| Nref           | 3784                  | 3782                  |
| Tmin,Tmax      | 0.759,0.892           | 0.739,0.890           |
| Tmin'          | 0.682                 |                       |

Correction method= MULTI-SCAN

Data completeness= 0.999                      Theta(max)= 25.680

R(reflections)= 0.0420( 2735)              wR2(reflections)= 0.1199( 3782)

S = 1.099                      Npar= 189

---

The following ALERTS were generated. Each ALERT has the format

**test-name\_ALERT\_alert-type\_alert-level.**

Click on the hyperlinks for more details of the test.

---

### Alert level C

|                   |                                               |     |                                  |      |       |
|-------------------|-----------------------------------------------|-----|----------------------------------|------|-------|
| PLAT222_ALERT_3_C | Large Non-Solvent                             | H   | Ueq(max)/Ueq(min) ...            | 3.10 | Ratio |
| PLAT232_ALERT_2_C | Hirshfeld Test Diff (M-X)                     | Pd1 | -- Cl2 ..                        | 5.23 | su    |
| PLAT242_ALERT_2_C | Check Low                                     |     | Ueq as Compared to Neighbors for |      | C5    |
| PLAT342_ALERT_3_C | Low Bond Precision on                         |     | C-C Bonds (x 1000) Ang ..        |      | 9     |
| PLAT790_ALERT_4_C | Centre of Gravity not Within Unit Cell: Resd. | #   |                                  |      | 1     |
|                   | C28 H60 Cl4 N4 P2 Pd2                         |     |                                  |      |       |

---

**Alert level G**

PLAT083\_ALERT\_2\_G SHELXL Second Parameter in WGHT Unusually Large.

7.42

---

0 **ALERT level A** = In general: serious problem  
0 **ALERT level B** = Potentially serious problem  
5 **ALERT level C** = Check and explain  
1 **ALERT level G** = General alerts; check

0 ALERT type 1 CIF construction/syntax error, inconsistent or missing data  
3 ALERT type 2 Indicator that the structure model may be wrong or deficient  
2 ALERT type 3 Indicator that the structure quality may be low  
1 ALERT type 4 Improvement, methodology, query or suggestion  
0 ALERT type 5 Informative message, check

---

---

### **Publication of your CIF in IUCr journals**

**A basic structural check has been run on your CIF. These basic checks will be run on all CIFs submitted for publication in IUCr journals (*Acta Crystallographica*, *Journal of Applied Crystallography*, *Journal of Synchrotron Radiation*); however, if you intend to submit to *Acta Crystallographica Section C* or *E*, you should make sure that full publication checks are run on the final version of your CIF prior to submission.**

### **Publication of your CIF in other journals**

**Please refer to the *Notes for Authors* of the relevant journal for any special instructions relating to CIF submission.**

---

**PLATON version of 13/08/2009; check.def file version of 12/08/2009**

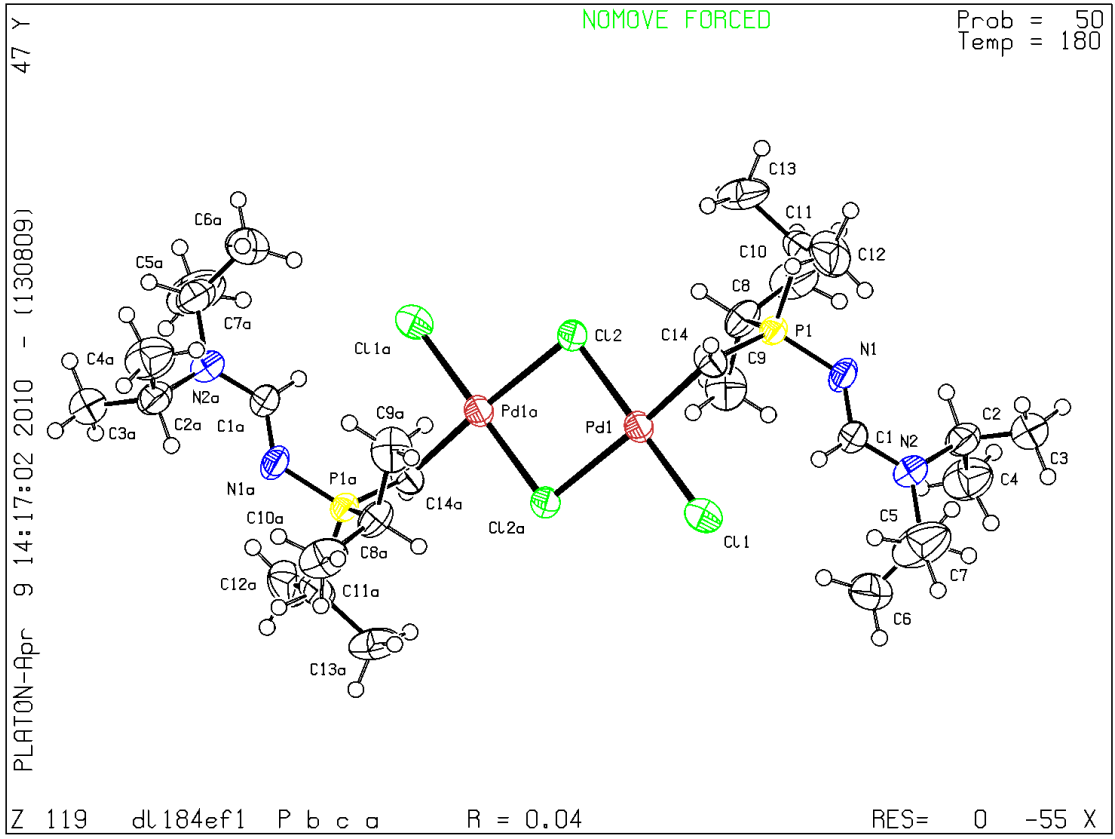

Supplement: mmc1 [file mmc1.pdf]
